# Supplementary material for: Machine learning model to predict mental health crisis from electronic health records
Source: Research Square preprint supplement (doi:10.21203/rs.3.rs-275866/v1), 2021-03-10
Supplement: Supplementary file 1 [file dc7d8c9bdc968d282b995c85.csv]

\textbf{Feature name}	\textbf{Source table}	\textbf{Included in final model}
contact\_dna\_without\_followup	Contacts	Yes
contact\_within\_last\_24\_weeks	Contacts	Yes
contact\_within\_last\_4\_weeks	Contacts	Yes
never\_contact	Contacts	Yes
time\_since\_last\_contact	Contacts	Yes
time\_since\_last\_contact\_dna	Contacts	Yes
time\_since\_last\_contact\_event\_code\_carer	Contacts	Yes
time\_since\_last\_contact\_event\_code\_fso	Contacts	Yes
time\_since\_last\_contact\_event\_code\_gro	Contacts	Yes
time\_since\_last\_contact\_event\_code\_other	Contacts	Yes
time\_since\_last\_contact\_event\_code\_rev	Contacts	Yes
time\_since\_last\_contact\_event\_code\_ts	Contacts	Yes
time\_since\_last\_contact\_unplanned	Contacts	Yes
contact	Contacts	No
contact\_dna	Contacts	No
contact\_event\_code\_carer	Contacts	No
contact\_event\_code\_fso	Contacts	No
contact\_event\_code\_gro	Contacts	No
contact\_event\_code\_other	Contacts	No
contact\_event\_code\_rev	Contacts	No
contact\_event\_code\_ts	Contacts	No
contact\_unplanned	Contacts	No
contacts\_sum	Contacts	No
crisis\_within\_last\_4\_weeks	Crisis Events	Yes
crisis\_within\_last\_8\_weeks	Crisis Events	Yes
max\_severity\_crisis\_last\_crisis	Crisis Events	Yes
never\_crisis	Crisis Events	Yes
number\_crises\_burst\_1week\_passed	Crisis Events	Yes
number\_of\_crisis\_last\_crisis	Crisis Events	Yes
number\_of\_days\_in\_crisis\_last\_crisis	Crisis Events	Yes
time\_since\_last\_crisis	Crisis Events	Yes
crisis\_contact\_alloc\_method\_bm\_bed\_mngmnt\_day\_max	Crisis Events	No
crisis\_contact\_alloc\_method\_bm\_pdu\_day\_max	Crisis Events	No
crisis\_contact\_alloc\_method\_bm\_po\_s\_day\_max	Crisis Events	No
crisis\_contact\_alloc\_method\_contact\_max	Crisis Events	No
crisis\_contact\_alloc\_method\_ip\_bed\_day\_max	Crisis Events	No
crisis\_contact\_alloc\_method\_ooa\_max	Crisis Events	No
crisis\_contact\_alloc\_method\_rnc\_max	Crisis Events	No
crisis\_contact\_alloc\_method\_st\_max	Crisis Events	No
crisis\_event\_type\_code\_bm\_max	Crisis Events	No
crisis\_event\_type\_code\_ip\_max	Crisis Events	No
crisis\_event\_type\_code\_ooa\_max	Crisis Events	No
crisis\_event\_type\_code\_tr\_max	Crisis Events	No
crisis\_max	Crisis Events	No
crisis\_min	Crisis Events	No
crisis\_sum	Crisis Events	No
crisis\_sum\_ever	Crisis Events	No
number\_crises\_events\_passed	Crisis Events	No
number\_crisis\_burst\_1week	Crisis Events	No
number\_crisis\_burst\_2week	Crisis Events	No
severity\_max	Crisis Events	No
crisis\_plan\_up\_to\_date	Crisis Plans	Yes
current\_age	Demographics	Yes
older\_than\_65	Demographics	Yes
static\_gender\_female	Demographics	Yes
years\_since\_known	Demographics	Yes
months\_since\_known	Demographics	No
static\_ethnic\_group\_asian	Demographics	No
static\_ethnic\_group\_black	Demographics	No
static\_ethnic\_group\_mixed	Demographics	No
static\_ethnic\_group\_not\_known	Demographics	No
static\_ethnic\_group\_other	Demographics	No
static\_ethnic\_group\_white	Demographics	No
static\_gender\_male	Demographics	No
static\_marital\_status\_co\_habitee	Demographics	No
static\_marital\_status\_divorced	Demographics	No
static\_marital\_status\_married	Demographics	No
static\_marital\_status\_not\_asked	Demographics	No
static\_marital\_status\_not\_disclosed	Demographics	No
static\_marital\_status\_not\_recorded	Demographics	No
static\_marital\_status\_other\_unknown	Demographics	No
static\_marital\_status\_separated	Demographics	No
static\_marital\_status\_single	Demographics	No
static\_marital\_status\_unknown	Demographics	No
static\_marital\_status\_widowed	Demographics	No
F0 Organic including symptomatic mental disorders	Diagnosis	Yes
F1 Mental and behavioural disorders due to psychoactive substance use	Diagnosis	Yes
F2 Schizophrenia schizotypal and delusional disorders	Diagnosis	Yes
F3 Mood affective disorders	Diagnosis	Yes
F4 Neurotic stress related and somatoform disorders	Diagnosis	Yes
F6 Disorders of adult personality and behaviour	Diagnosis	Yes
Not diagnosed	Diagnosis	Yes
Other diagnosis	Diagnosis	Yes
current\_dual\_diagnosis	Diagnosis	Yes
never\_diagnosed	Diagnosis	Yes
level\_of\_obs\_1\_last\_crisis	Hospitalizations	Yes
level\_of\_obs\_1\_number\_of\_days\_last\_crisis	Hospitalizations	Yes
level\_of\_obs\_2\_last\_crisis	Hospitalizations	Yes
level\_of\_obs\_2\_number\_of\_days\_last\_crisis	Hospitalizations	Yes
level\_of\_obs\_3\_last\_crisis	Hospitalizations	Yes
level\_of\_obs\_3\_number\_of\_days\_last\_crisis	Hospitalizations	Yes
level\_of\_obs\_4\_last\_crisis	Hospitalizations	Yes
level\_of\_obs\_4\_number\_of\_days\_last\_crisis	Hospitalizations	Yes
level\_of\_obs\_max\_last\_crisis	Hospitalizations	Yes
max\_length\_stay\_last\_crisis	Hospitalizations	Yes
never\_hospitalized	Hospitalizations	Yes
number\_of\_bed\_days\_last\_crisis	Hospitalizations	Yes
number\_of\_leave\_days\_last\_crisis	Hospitalizations	Yes
never\_mha\_episode	Mental Health Act	Yes
cto\_status\_active	Mental Health Act	No
cto\_status\_not\_applicable	Mental Health Act	No
cto\_status\_recalled	Mental Health Act	No
mha\_section\_code	Mental Health Act	No
week	No source table	Yes
week\_cos	No source table	Yes
week\_sin	No source table	Yes
year	No source table	No
never\_referral	Referrals	Yes
time\_since\_last\_referral	Referrals	Yes
time\_since\_last\_referral\_event\_discharge\_category\_complete	Referrals	Yes
time\_since\_last\_referral\_event\_discharge\_category\_declined	Referrals	Yes
time\_since\_last\_referral\_event\_discharge\_category\_dna	Referrals	Yes
time\_since\_last\_referral\_event\_discharge\_category\_internal	Referrals	Yes
time\_since\_last\_referral\_event\_discharge\_category\_no\_mh	Referrals	Yes
time\_since\_last\_referral\_event\_discharge\_category\_not\_suitable	Referrals	Yes
time\_since\_last\_referral\_event\_discharge\_category\_other	Referrals	Yes
time\_since\_last\_referral\_event\_discharge\_category\_security	Referrals	Yes
time\_since\_last\_referral\_event\_source\_category\_acute	Referrals	Yes
time\_since\_last\_referral\_event\_source\_category\_ambulance	Referrals	Yes
time\_since\_last\_referral\_event\_source\_category\_carer	Referrals	Yes
time\_since\_last\_referral\_event\_source\_category\_community	Referrals	Yes
time\_since\_last\_referral\_event\_source\_category\_gp	Referrals	Yes
time\_since\_last\_referral\_event\_source\_category\_internal	Referrals	Yes
time\_since\_last\_referral\_event\_source\_category\_local\_authority	Referrals	Yes
time\_since\_last\_referral\_event\_source\_category\_mental\_health	Referrals	Yes
time\_since\_last\_referral\_event\_source\_category\_other\_agency	Referrals	Yes
time\_since\_last\_referral\_event\_source\_category\_primary\_care	Referrals	Yes
time\_since\_last\_referral\_event\_source\_category\_self	Referrals	Yes
referral	Referrals	No
referral\_event\_discharge\_category\_complete	Referrals	No
referral\_event\_discharge\_category\_declined	Referrals	No
referral\_event\_discharge\_category\_dna	Referrals	No
referral\_event\_discharge\_category\_internal	Referrals	No
referral\_event\_discharge\_category\_no\_mh	Referrals	No
referral\_event\_discharge\_category\_not\_suitable	Referrals	No
referral\_event\_discharge\_category\_other	Referrals	No
referral\_event\_discharge\_category\_security	Referrals	No
referral\_event\_source\_category\_acute	Referrals	No
referral\_event\_source\_category\_ambulance	Referrals	No
referral\_event\_source\_category\_carer	Referrals	No
referral\_event\_source\_category\_community	Referrals	No
referral\_event\_source\_category\_gp	Referrals	No
referral\_event\_source\_category\_internal	Referrals	No
referral\_event\_source\_category\_local\_authority	Referrals	No
referral\_event\_source\_category\_mental\_health	Referrals	No
referral\_event\_source\_category\_other\_agency	Referrals	No
referral\_event\_source\_category\_primary\_care	Referrals	No
referral\_event\_source\_category\_self	Referrals	No
referral\_state\_discharge\_category\_NoMH	Referrals	No
referral\_state\_discharge\_category\_complete	Referrals	No
referral\_state\_discharge\_category\_declined	Referrals	No
referral\_state\_discharge\_category\_dna	Referrals	No
referral\_state\_discharge\_category\_internal	Referrals	No
referral\_state\_discharge\_category\_not\_suitable	Referrals	No
referral\_state\_discharge\_category\_other	Referrals	No
referral\_state\_discharge\_category\_security	Referrals	No
referral\_state\_source\_category\_acute	Referrals	No
referral\_state\_source\_category\_ambulance	Referrals	No
referral\_state\_source\_category\_carer	Referrals	No
referral\_state\_source\_category\_community	Referrals	No
referral\_state\_source\_category\_gp	Referrals	No
referral\_state\_source\_category\_internal	Referrals	No
referral\_state\_source\_category\_local\_authority	Referrals	No
referral\_state\_source\_category\_mental\_Health	Referrals	No
referral\_state\_source\_category\_other\_agency	Referrals	No
referral\_state\_source\_category\_primary\_care	Referrals	No
referral\_state\_source\_category\_self	Referrals	No
referral\_sum	Referrals	No
never\_risk\_assessment	Risk Assessments	Yes
risk\_assessment\_up\_to\_date	Risk Assessments	Yes
risk\_forensic\_care	Risk Assessments	Yes
risk\_med\_phys	Risk Assessments	Yes
risk\_of\_absconding	Risk Assessments	Yes
risk\_of\_accident	Risk Assessments	Yes
risk\_of\_harm\_from\_others	Risk Assessments	Yes
risk\_of\_violence	Risk Assessments	Yes
risk\_self\_harm	Risk Assessments	Yes
risk\_self\_neglect	Risk Assessments	Yes
risk\_substance\_misuse	Risk Assessments	Yes
risk\_suicide	Risk Assessments	Yes
risk\_to\_children	Risk Assessments	Yes
time\_since\_last\_risk\_forensic\_care	Risk Assessments	Yes
time\_since\_last\_risk\_med\_phys	Risk Assessments	Yes
time\_since\_last\_risk\_of\_absconding	Risk Assessments	Yes
time\_since\_last\_risk\_of\_accident	Risk Assessments	Yes
time\_since\_last\_risk\_of\_harm\_from\_others	Risk Assessments	Yes
time\_since\_last\_risk\_of\_violence	Risk Assessments	Yes
time\_since\_last\_risk\_self\_harm	Risk Assessments	Yes
time\_since\_last\_risk\_self\_neglect	Risk Assessments	Yes
time\_since\_last\_risk\_substance\_misuse	Risk Assessments	Yes
time\_since\_last\_risk\_suicide	Risk Assessments	Yes
time\_since\_last\_risk\_to\_children	Risk Assessments	Yes
never\_wellbeing\_assessment	Wellbeing Assessments	Yes
wellbeing\_emotional	Wellbeing Assessments	Yes
wellbeing\_four\_factor\_total	Wellbeing Assessments	Yes
wellbeing\_personal	Wellbeing Assessments	Yes
wellbeing\_severe\_disturbance	Wellbeing Assessments	Yes
wellbeing\_social	Wellbeing Assessments	Yes
